# Supplementary material for: In Silico Study of the Mechanism of Binding of the N-Terminal Region of α Synuclein to Synaptic-Like Membranes
Source: Life (Basel). 2020 Jun 26;10(6):98. doi: 10.3390/life10060098 (PMC7344899; doi:10.3390/life10060098)

Supplementary Material

# In silico study of the mechanism of binding of the N-terminal region of $\alpha$ Synuclein to synaptic-like membranes

Carlos Navarro-Paya<sup>1</sup>, Maximo Sanz-Hernandez<sup>1</sup>, Alfonso De Simone<sup>1,2,\*</sup>

<sup>1</sup> Department of Life Sciences, Imperial College London, South Kensington, SW7 2AX UK;

<sup>2</sup> Department of Pharmacy, University of Naples "Federico II", via D. Montesano 49 Naples, 80131 Italy;

\* Correspondence: adesimon@imperial.ac.uk

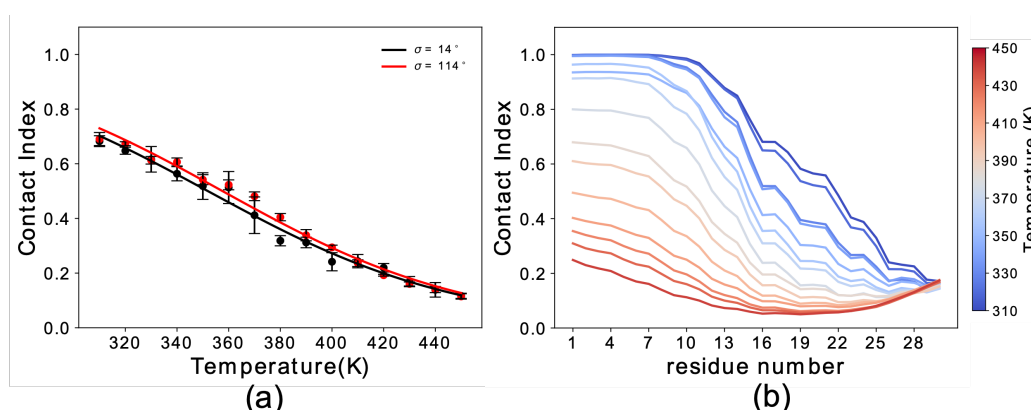

**Figure S1. Effects of the variation in the  $\sigma$  of the restraining potential.** We assessed if the conformational properties of the extended-disordered conformation are influenced by different values of  $\sigma$  employed in both angle and dihedral restraints. A) Membrane-binding melting curves calculated from plotting the global contact index as a function of the temperature of the simulation. The curves calculated from simulations using  $\sigma$  values of  $14^\circ$  (black) and  $114^\circ$  (red) are largely similar. B) Residue specific contact indexes in the range of temperatures going from 310K (dark blue) to 450K (dark red) at step increment of 10K. Plots for  $\alpha$ S<sub>1-30</sub> binding to DOPE:DOPS:DOPC lipid bilayer in the extended-disordered conformations are shown. These simulations were run with a  $\sigma$  value of  $114^\circ$ . Data using a  $\sigma$  value of  $14^\circ$  are shown in Fig. 1D.

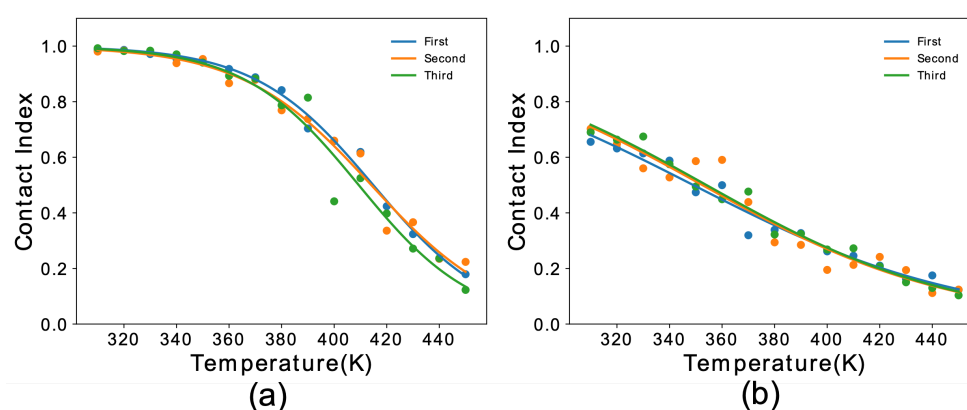

**Figure S2. Simulations convergence.** The convergence of the simulations has been assessed by dividing the trajectories in three equivalent and consecutive segments and by comparing observables calculated in these samplings. **(a-b)** Membrane-binding melting curves calculated from plotting the global contact index as a function of the temperature of the simulation. Plots for  $\alpha S_{1-30}$  binding to DOPE:DOPS:DOPC lipid bilayer in the helical **(a)** and extended-disordered **(b)** conformations are shown. First, second and third segments of the simulations are shown in orange blue and green, respectively.

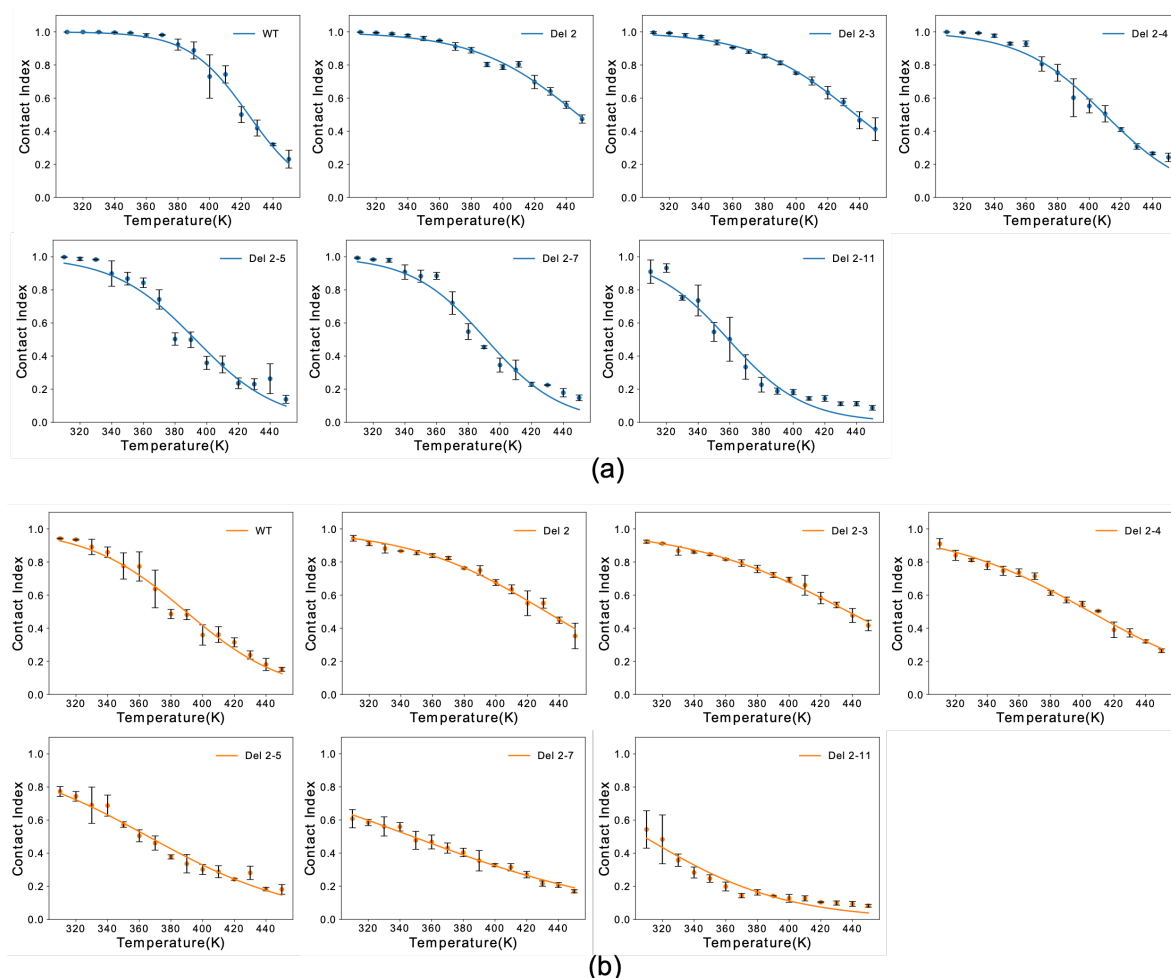

**Figure S3. Membrane interactions by different deletion constructs  $\alpha$ S<sub>1-30</sub>.** Membrane-binding melting curves calculated from plotting the global contact index as a function of the temperature of the simulation. Plots for the binding to DOPE:DOPS:DOPC by various  $\alpha$ S constructs in the helical (a) and extended-disordered (b) conformations are shown. These plots are calculated by considering only the first 15 residues of each construct.

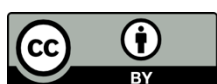

Supplement: Supplementary file 1 [file life-10-00098-s001.pdf]
